# Supplementary material for: Preparation and Characterization of Screen-Printed Cu2S/PEDOT:PSS Hybrid Films for Flexible Thermoelectric Power Generator
Source: MDPI journal article supplement (doi:10.3390/nano12142430), 2022-07-15
Supplement: s1 [file s1]

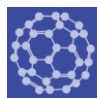

## Supplementary Materials

# Preparation and Characterization of Screen-Printed $\text{Cu}_2\text{S}/\text{PEDOT:PSS}$ Hybrid Films for Flexible Thermoelectric Power Generator

Junmei Zhao <sup>1</sup>, Xiaolong Zhao <sup>1</sup>, Rui Guo <sup>2</sup>, Yaxin Zhao <sup>2</sup>, Chenyu Yang <sup>1,2</sup>, Liping Zhang <sup>1</sup>, Dan Liu <sup>1,2,\*</sup> and Yifeng Ren <sup>1,\*</sup>

<sup>1</sup> School of Electrical and Control Engineering, North University of China, Taiyuan 030051, China; zhaojunmei@nuc.edu.cn (J.Z.); zhaoxiaolong@nuc.edu.cn (X.Z.); yangwangcg@163.com (C.Y.); zhangliping@nuc.edu.cn (L.Z.)

<sup>2</sup> Key Laboratory of Instrumentation Science & Dynamic Measurement, Ministry of Education, North University of China, Taiyuan 030051, China; 18406589626@163.com (R.G.); zhaoyaxinnuc@163.com (Y.Z.)

\* Correspondence: liudan235@nuc.edu.cn (D.L.); renyifeng@nuc.edu.cn (Y.R.)

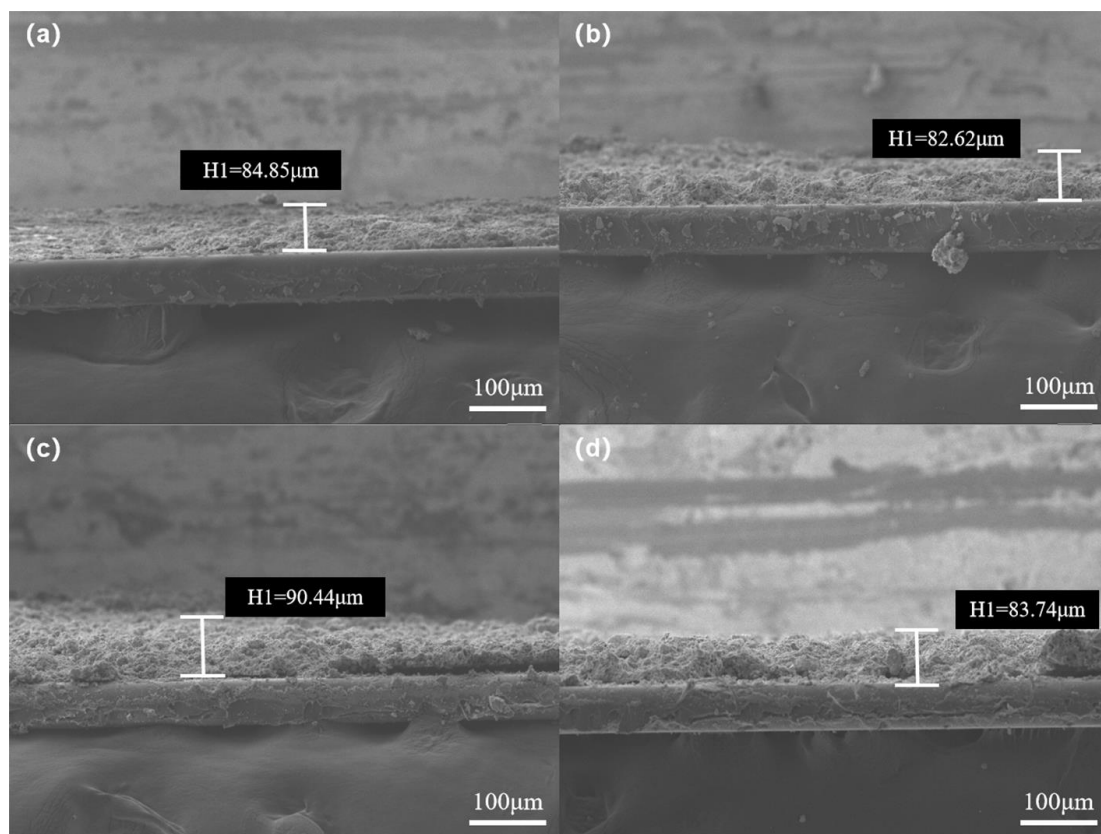

**Figure S1.** The cross-sections of (a) P1.1, (b) P1.2, (c) P1.3, and (d) P1.4 films.

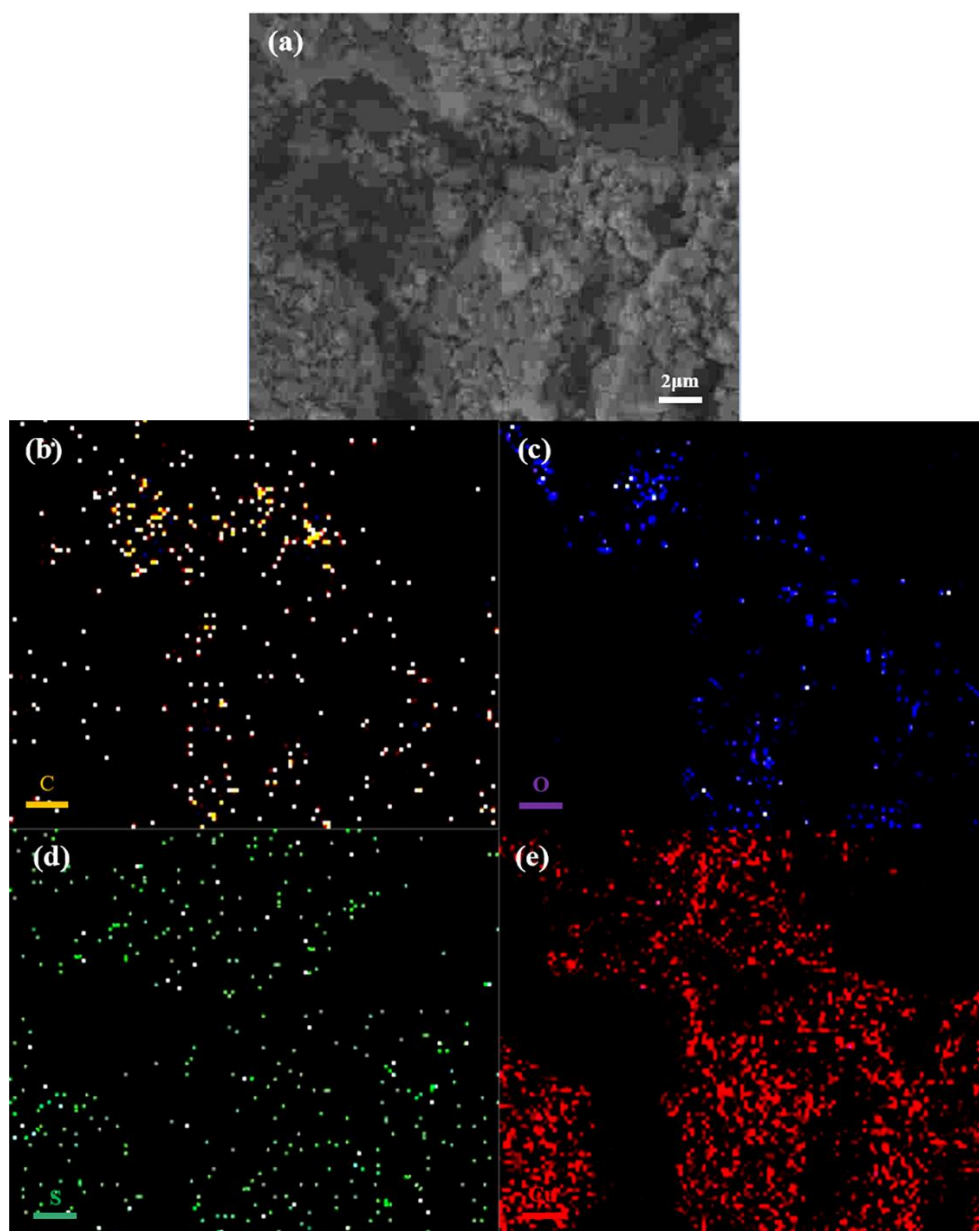

**Figure S2.** Element mapping diagram of P1.2 film, (a) SEM diagram of P1.2 film, (b) C element, (c) O element, (d) S element, (e) Cu element.

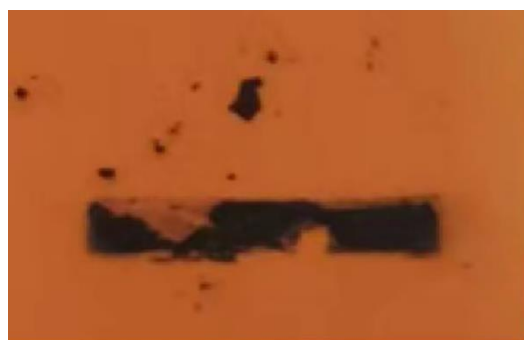

**Figure S3.** The image of the P1.1 film module no longer adheres to the PI substrate.
